# Supplementary material
Source: HighWire-hosted journal article supplement (https://erj.ersjournals.com/content/61/4/2300171)
Supplement: inline-supplementary-material-1 [file inline-supplementary-material-1.pdf]

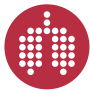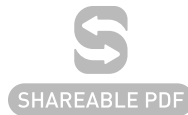

# Chronic thromboembolic pulmonary hypertension and clot resolution after COVID-19-associated pulmonary embolism

Cindy M.M. de Jong <sup>1</sup>, Chantal Visser <sup>2</sup>, Remy H.H. Bemelmans<sup>3</sup>, Wim G. Boersma<sup>4</sup>, Bram van den Borst <sup>5</sup>, J. Louise I. Burggraaf<sup>6</sup>, Suzanne C. Cannegieter <sup>1,6</sup>, Arina J. ten Cate-Hoek<sup>7,8</sup>, F. Nanne Croles<sup>9</sup>, Harald J. Faber<sup>10</sup>, Laura M. Faber<sup>11</sup>, Merel E. Hellemons <sup>12,13</sup>, Lisa M. Hessels <sup>4</sup>, Menno V. Huisman <sup>1</sup>, Pieter W. Kamphuisen<sup>14,15</sup>, Stephanie C.E. Koster <sup>16</sup>, Lucia J.M. Kroft <sup>17</sup>, Ivo van der Lee<sup>18</sup>, Jenneke Leentjens <sup>19</sup>, Karina Meijer<sup>20</sup>, Maarten K. Ninaber<sup>21</sup>, Brigitte M. Sondermeijer<sup>18</sup>, Susanne Stads<sup>22</sup>, Anton Vonk Noordegraaf <sup>23</sup>, Kristien Winckers<sup>7,8</sup>, Marieke J.H.A. Kruij <sup>2</sup> and Frederikus A. Klok <sup>1</sup> on behalf of the Dutch COVID & Thrombosis Coalition investigators

<sup>1</sup>Department of Medicine – Thrombosis and Hemostasis, Leiden University Medical Center, Leiden, The Netherlands. <sup>2</sup>Department of Haematology, Erasmus MC, University Medical Center Rotterdam, Rotterdam, The Netherlands. <sup>3</sup>Department of Internal Medicine, Hospital Gelderse Vallei, Ede, The Netherlands. <sup>4</sup>Department of Pulmonology, North West Hospital Alkmaar, Alkmaar, The Netherlands. <sup>5</sup>Department of Pulmonary Diseases, Radboud University Medical Center, Nijmegen, The Netherlands. <sup>6</sup>Department of Clinical Epidemiology, Leiden University Medical Center, Leiden, The Netherlands. <sup>7</sup>Thrombosis Expertise Center Maastricht and Department of Internal Medicine, Section Vascular Medicine, Maastricht University Medical Center, Maastricht, The Netherlands. <sup>8</sup>Cardiovascular Research Institute Maastricht (CARIM), School for Cardiovascular Diseases, Maastricht, The Netherlands. <sup>9</sup>Department of Internal Medicine, Hospital St. Jansdal, Harderwijk, The Netherlands. <sup>10</sup>Department of Intensive Care, Wilhelmina Hospital Assen, Assen, The Netherlands. <sup>11</sup>Department of Internal Medicine, Rode Kruis Hospital, Beverwijk, The Netherlands. <sup>12</sup>Department of Respiratory Medicine, Erasmus University Medical Center Rotterdam, Rotterdam, The Netherlands. <sup>13</sup>Erasmus MC Transplant Institute, Erasmus University Medical Center Rotterdam, Rotterdam, The Netherlands. <sup>14</sup>Department of Internal Medicine, Tergooi Hospital, Hilversum, The Netherlands. <sup>15</sup>Department of Vascular Medicine, Amsterdam University Medical Centre, Amsterdam, The Netherlands. <sup>16</sup>Department of Intensive Care, Zaans Medical Centre, Zaandam, The Netherlands. <sup>17</sup>Department of Radiology, Leiden University Medical Center, Leiden, The Netherlands. <sup>18</sup>Department of Pulmonology, Spaarne Hospital, Haarlem, The Netherlands. <sup>19</sup>Department of Internal Medicine, Radboud Institute for Health Sciences, Radboud University Medical Center, Nijmegen, The Netherlands. <sup>20</sup>Department of Haematology, University Medical Centre Groningen, Groningen, The Netherlands. <sup>21</sup>Department of Pulmonology, Leiden University Medical Center, Leiden, The Netherlands. <sup>22</sup>Department of Intensive Care, Ikazia Hospital, Rotterdam, The Netherlands. <sup>23</sup>Department of Pulmonary Medicine, Amsterdam Cardiovascular Sciences, Amsterdam UMC, Vrije Universiteit Amsterdam, Amsterdam, The Netherlands.

Corresponding author: Frederikus A. Klok (f.a.klok@lumc.nl)

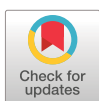

Shareable abstract (@ERSpublications)

The results of this study suggest that CTEPH is not a more common long-term complication after COVID-19-associated PE than after PE in non-COVID-19 patients, and thrombus resolution did not seem to be different from non-COVID-19-associated PE <https://bit.ly/3ljvWL3>

**Cite this article as:** de Jong CMM, Visser C, Bemelmans RHH, *et al.* Chronic thromboembolic pulmonary hypertension and clot resolution after COVID-19-associated pulmonary embolism. *Eur Respir J* 2023; 61: 2300171 [DOI: 10.1183/13993003.00171-2023].

This single-page version can be shared freely online.

Copyright ©The authors 2023.

This version is distributed under the terms of the Creative Commons Attribution Non-Commercial Licence 4.0. For commercial reproduction rights and permissions contact [permissions@ersnet.org](mailto:permissions@ersnet.org)

*To the Editor:*

The incidence of chronic thromboembolic pulmonary hypertension (CTEPH) in coronavirus disease 2019 (COVID-19) survivors who were diagnosed with acute pulmonary embolism (PE) is currently unknown. Considering the high PE incidence reported in COVID-19 and its potentially unique pathophysiology, it may be hypothesised that thrombus resolution occurs to a lesser extent after COVID-19-associated PE, and that the prevalence of CTEPH is higher compared to non-COVID-19-associated PE populations. CTEPH could therefore be a treatable cause of long COVID, which captures a broad range of post-acute COVID-19 sequelae, in those with PE during acute COVID-19 [1]. In this multicentre cross-sectional study, we aimed
